# Supplementary material
Source: HighWire-hosted journal article supplement (http://www.qdcxjkg.com/highwire/filestream/113914/field_highwire_adjunct_files/0/table_1_online_depository.pdf)
Supplement: table_1_online_depository.pdf [file table_1_online_depository.pdf]

Online Depository

**Title:**

Reduced neonatal lung function and wheezing illnesses during the first five years of life

**Results**

Subject characteristics

**Online depository table 1.**

|                                                                          | Total cohort                   | Group that already reached the age of 5 years | P-value compared to the children in the cohort below the age of 5 years | Group with successful SOT, and complete medical records | P-value compared to other children in the cohort. | Group with successful SOT, complete medical records, and successful visit at 5 years of age | P-value compared to other children in the cohort. |
|--------------------------------------------------------------------------|--------------------------------|-----------------------------------------------|-------------------------------------------------------------------------|---------------------------------------------------------|---------------------------------------------------|---------------------------------------------------------------------------------------------|---------------------------------------------------|
|                                                                          | N = 2150                       | N = 918                                       |                                                                         | N = 549                                                 |                                                   | N = 298                                                                                     |                                                   |
| Sex (% boys)                                                             | 49.3                           | 49.2                                          | 0.988 <sup>a</sup>                                                      | 47.9                                                    | 0.463 <sup>a</sup>                                | 47.3                                                                                        | 0.373 <sup>a</sup>                                |
| Birth Weight (mean, grams, SD)                                           | 3524 (515)                     | 3497 (535)                                    | 0.058 <sup>b</sup>                                                      | 3509 (516)                                              | 0.413 <sup>b</sup>                                | 3502 (492)                                                                                  | 0.296 <sup>b</sup>                                |
| Gestational age (mean days, SD)                                          | 278.6 (10)                     | 278.5 (10.4)                                  | 0.721 <sup>b</sup>                                                      | 278.9 (10.2)                                            | 0.364 <sup>b</sup>                                | 279 (9.6)                                                                                   | 0.547 <sup>b</sup>                                |
| Age at measurement (median, days, IQR)                                   | 33 (28-40)<br>45.2 (38.2-52.6) | 31 (26-37)                                    | <0.001 <sup>c</sup>                                                     | 31 (26-37)                                              | <0.001 <sup>c</sup>                               | 31 (26-37)                                                                                  | <0.001 <sup>c</sup>                               |
| Crs (median, ml/kPa, IQR)                                                | 42.0 (34.9-49.3)               | 42.0 (34.9-49.3)                              | <0.001 <sup>c</sup>                                                     | 42.1 (35.4-49.3)                                        | <0.001 <sup>c</sup>                               | 41.8 (35.4-48.6)                                                                            | <0.001 <sup>c</sup>                               |
| Rrs (median, kPa/l/s, IQR)                                               | 6.4 (5.3-7.8)                  | 7.0 (5.0-8.7)                                 | <0.001 <sup>c</sup>                                                     | 6.9 (5.8-8.7)                                           | <0.001 <sup>c</sup>                               | 6.8 (5.7-8.3)                                                                               | <0.001 <sup>c</sup>                               |
| Siblings (% with at least one)                                           | 53                             | 50.9                                          | 0.081 <sup>a</sup>                                                      | 51                                                      | 0.267 <sup>a</sup>                                | 54.4                                                                                        | 0.743 <sup>a</sup>                                |
| Maternal allergy (allergy to pollen, house dust mite, food, or pets) (%) | 38.1                           | 39.4                                          | 0.350 <sup>a</sup>                                                      | 39.0                                                    | 0.662 <sup>a</sup>                                | 37.8                                                                                        | 0.926 <sup>a</sup>                                |
| Paternal allergy (allergy to pollen, house dust mite, food, or pets) (%) | 37.6                           | 37.4                                          | 0.915 <sup>a</sup>                                                      | 39.4                                                    | 0.381 <sup>a</sup>                                | 42.6                                                                                        | 0.072 <sup>a</sup>                                |
| Maternal smoking during pregnancy (%)                                    | 6.3                            | 8.0                                           | 0.008 <sup>a</sup>                                                      | 7.3                                                     | 0.286 <sup>a</sup>                                | 6.7                                                                                         | 0.525 <sup>a</sup>                                |
| Maternal smoke exposure during pregnancy (%)                             | 16.1                           | 25.1                                          | <0.001 <sup>a</sup>                                                     | 24                                                      | <0.001 <sup>a</sup>                               | 22.5                                                                                        | <0.001 <sup>a</sup>                               |
| Daycare visit in first 6 months of life (%)                              | 60.5                           | 56.4                                          | 0.002 <sup>a</sup>                                                      | 59.9                                                    | 0.868 <sup>a</sup>                                | 61.2                                                                                        | 0.198 <sup>a</sup>                                |
| Maternal higher education (%)                                            | 66.0                           | 64.0                                          | 0.148 <sup>a</sup>                                                      | 64.3                                                    | 0.404 <sup>a</sup>                                | 65.2                                                                                        | 0.111 <sup>a</sup>                                |
| Maternal age > 30 yr (%)                                                 | 62.4                           | 61.4                                          | 0.440 <sup>a</sup>                                                      | 65.8                                                    | 0.058 <sup>a</sup>                                | 70.1                                                                                        | <0.001 <sup>a</sup>                               |
| Ethnicity mother (% Western)                                             | 89.6                           | 91.2                                          | 0.078 <sup>a</sup>                                                      | 90.2                                                    | 0.680 <sup>a</sup>                                | 90.8                                                                                        | 0.723 <sup>a</sup>                                |

Table 1. General characteristics of the total study population, the population that already reached the age of 5 years, the group with successful SOT and complete medical records, and the group with successful SOT, complete medical records and successful spirometry at the age of 5, with p-values of subgroups compared to total cohort. a= Chi-square test, b= T-test, c= Mann-Whitney test.
